# Supplementary material for: Retinal Microvascular and Structural Changes in Chronic Coronary Artery Disease and Ischemic Stroke: A Comparative OCTA and OCT Study
Source: Research Square preprint supplement (doi:10.21203/rs.3.rs-8014609/v1), 2025-12-08
Supplement: Supplementary file 1 [file 553a9dd6573b7944a58f5c79.docx]

**Supplement:**

**Table S1.** Correlation between microvascular parameters and altered baseline characteristics in the CAD group.

| **CAD Macular VD** | **Baseline characteristic** | ***r*** | ***p*-value** |
| --- | --- | --- | --- |
| **SCP _Center** | History of DM, | −0.037 | 0.520 |
|  | History of HTN | −0.024 | 0.681 |
|  | DBP | −0.015 | 0.792 |
|  | LDL | −0.063 | 0.276 |
|  | TC | −0.072 | 0.210 |
|  | TP | −0.007 | 0.906 |
|  | GLU | −0.031 | 0.588 |
| **DCP_Center** | History of DM, | 0.047 | 0.419 |
|  | History of HTN | 0.072 | 0.212 |
|  | DBP | −0.027 | 0.639 |
|  | LDL | −0.024 | 0.683 |
|  | TC | 0.003 | 0.961 |
|  | TP | −0.004 | 0.950 |
|  | GLU | 0.050 | 0.387 |
| **CHOROID_Center** | History of DM | −0.015 | 0.800 |
|  | History of HTN | −0.010 | 0.860 |
|  | DBP | 0.039 | 0.497 |
|  | LDL | −0.060 | 0.295 |
|  | TC | −0.076 | 0.191 |
|  | TP | −0.038 | 0.514 |
|  | GLU | −0.029 | 0.612 |
| **DCP_ Nasal** | History of DM, | 0.005 | 0.926 |
|  | History of HTN | 0.007 | 0.903 |
|  | DBP | −0.045 | 0.434 |
|  | LDL | 0.023 | 0.687 |
|  | TC | 0.017 | 0.769 |
|  | TP | 0.000 | 0.998 |
|  | GLU | 0.074 | 0.199 |

CAD macular VD: vessel density parameters differing significantly from controls.

*P* <0.05 from the correlation analysis.

**Table S2.** Correlation between microvascular parameters and altered baseline characteristics in the IS group.

| **IS Macular VD** | **Baseline characteristic** | ***r*** | ***p*-value** |
| --- | --- | --- | --- |
| **SCP _Center** | Sex | −0.066 | 0.525 |
|  | History of HTN | 0.011 | 0.917 |
|  | TC | 0.056 | 0.585 |
|  | CRE | 0.008 | 0.941 |
|  | HDL | −0.027 | 0.792 |
|  | LDL | 0.017 | 0.871 |
| **DCP _Center** | Sex | −0.169 | 0.100 |
|  | History of HTN | 0.041 | 0.695 |
|  | TC | −0.042 | 0.682 |
|  | CRE | 0.099 | 0.337 |
|  | HDL | −0.122 | 0.237 |
|  | LDL | −0.079 | 0.442 |

IS macular VD: vessel density parameters differing significantly from controls.

*P* <0.05 from the correlation analysis.

**Table S3.** Correlation between microvascular parameters and altered baseline characteristics in the CAD+IS group.

| **CAD+IS Macular VD** | **Baseline characteristic** | ***r*** | ***p*-value** |
| --- | --- | --- | --- |
| **SCP _Center** | Age | 0.129 | 0.496 |
|  | History of DM | −0.310 | 0.095 |
|  | History of HTN | 0.053 | 0.782 |
|  | BMI | 0.066 | 0.712 |
| **DCP_Center** | Age | 0.199 | 0.729 |
|  | History of DM | −0.135 | 0.478 |
|  | History of HTN | −0.162 | 0.391 |
|  | BMI | −0.011 | 0.955 |
| **CHOROID Center** | Age | -0.138 | 0.466 |
|  | History of DM | 0.017 | 0.927 |
|  | History of HTN | −0.284 | 0.128 |
|  | BMI | 0.079 | 0.678 |

CAD+IS macular VD: vessel density parameters differing significantly from controls.

*P* <0.05 from the correlation analysis.

**Table S4.** Correlations between altered OCTA/OCT parameters and the duration of CAD.

| **Correlated Parameters** | ***R*** | ***p*-value** |
| --- | --- | --- |
| Superficial-center | 0.062 | 0.287 |
| Dcp-Center | −0.045 | 0.44 |
| Dcp-N | 0.045 | 0.44 |
| Choroid-center | −0.069 | 0.236 |
| Choroid-T | −0.04 | 0.495 |
| RNFL-center | −0.112 | 0.052 |
| RNFL S | −0.049 | 0.4 |
| RNFL N | −0.059 | 0.307 |
| GCL_ Center | −0.097 | 0.093 |
| GCLL_ Center | −0.108 | 0.06 |
| GCLL T | 0.025 | 0.663 |
| GCLL S | −0.02 | 0.729 |
| GCLL N | −0.013 | 0.822 |
| GCLL I | −0.011 | 0.846 |
| Retina_ Center | −0.127 | 0.027***** |
| RETINA T | −0.039 | 0.496 |
| RETINA N | −0.087 | 0.132 |
| RETINA I | −0.07 | 0.228 |

Adjusted for age.

**Table S5.** Correlations between altered OCTA/OCT parameters and the duration of IS.

| **Correlated Parameters** | ***R*** | ***p*-value** |
| --- | --- | --- |
| Superficial-center | 0.042 | 0.689 |
| Dcp-Center | 0.125 | 0.226 |
| RNFL-N | −0.069 | 0.508 |
| GCL-S | 0.136 | 0.189 |
| GCLL-S | 0.066 | 0.523 |
| GCLL-N | 0.057 | 0.582 |
| GCLL-I | 0.114 | 0.273 |
| RETINA-S | 0.041 | 0.696 |

Adjusted for age.

**Table S6.** Correlations between altered OCTA/OCT parameters and the duration of CAD+IS

| **CAD+IS** | **Duration of CAD** | | **Duration of IS** | |
| --- | --- | --- | --- | --- |
| **Correlated Parameters** | *r* | *p*-value | *r* | *p*-value |
| SCP-center | −0.122 | 0.527 | −0.207 | 0.280 |
| DCP-center | −0.331 | 0.079 | −0.264 | 0.166 |
| CCP-center | 0.040 | 0.835 | 0.082 | 0.671 |
| RNFL-center | 0.224 | 0.244 | 0.024 | 0.901 |
| RNFL S | 0.033 | 0.863 | 0.145 | 0.454 |
| RNFL I | −0.163 | 0.398 | −0.255 | 0.182 |
| GCL-center | 0.017 | 0.930 | −0.063 | 0.744 |
| GCL T | −0.136 | 0.483 | 0.096 | 0.620 |
| GCL S | −0.036 | 0.853 | 0.065 | 0.736 |
| GCL N | −0.183 | 0.341 | −0.035 | 0.856 |
| GCL I | 0.164 | 0.394 | 0.172 | 0.373 |
| GCLL-center | 0.038 | 0.844 | −0.071 | 0.713 |
| Retina-center | 0.042 | 0.827 | 0.044 | 0.819 |
| Retina T | 0.186 | 0.334 | 0.150 | 0.437 |
| Retina S | 0.107 | 0.580 | 0.013 | 0.945 |
| Retina N | −0.035 | 0.857 | −0.001 | 0.995 |
| Retina I | 0.172 | 0.373 | −0.096 | 0.619 |

Adjusted for age.
